# Supplementary material for: Unbiased cleavage site prediction uncovers viral antagonism of host innate immunity by SARS-CoV-2 3C-like protease
Source: JCI journal article supplement (doi:10.1172/jci.insight.185739), 2026-02-23
Supplement: sd1 [file 1]

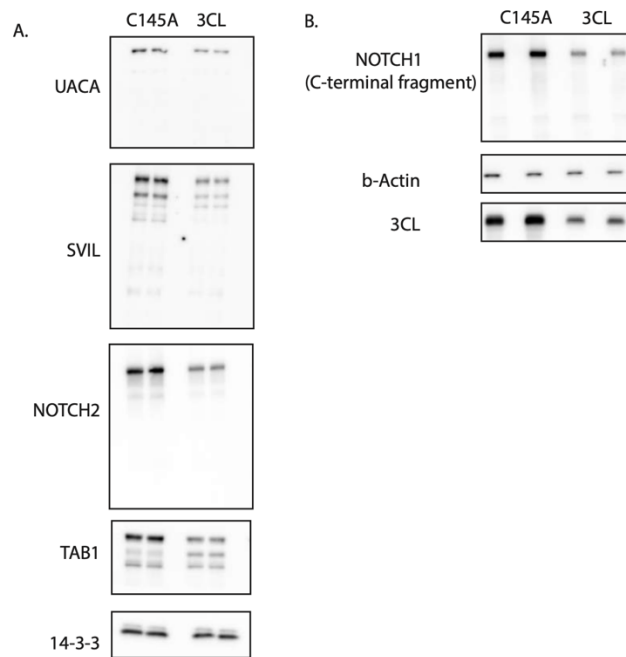

### Supplementary Figure 1

- A) Western blots of candidate cleavage targets. 48h expression of 3CLPro or C145A in 293T cells.
- B) Western blot for the C-terminal cleavage fragment of NOTCH1 following 48h expression in 293T cells.
